# Supplementary material
Source: PubMed Central journal article supplement (PMC8209916)
Supplement: EXSY-9999-0-s001.pdf [file EXSY-9999-0-s001.pdf]

Table 1 Cross Validation of dataset

| K-Fold | Dataset   |           |
|--------|-----------|-----------|
|        | Negative  | Positive  |
| 1      | 1-111     | 1-360     |
| 2      | 112-222   | 361-720   |
| 3      | 223-333   | 721-1080  |
| 4      | 334-444   | 1801-1440 |
| 5      | 445-555   | 1441-1800 |
| 6      | 556-666   | 1801-2160 |
| 7      | 667-777   | 2161-2520 |
| 8      | 778-888   | 2521-2880 |
| 9      | 889-999   | 2881-3240 |
| 10     | 1000-1110 | 3241-3600 |

For K1 in pneumonia dataset, we removed 1-111 negative samples and 1-360 positive samples as validation dataset while from 112-1110 negative samples and 361 to 3600 positive samples make up the training dataset. We repeated same process for K2 up to K10.

CODE

TRAINING

```
>> imds = imageDatastore('training', ...
    'IncludeSubfolders',true, ...
    'LabelSource','foldernames');
>> [imdsTrain,imdsValidation] = splitEachLabel(imds,0.7,'randomized');
>> numTrainImages = numel(imdsTrain.Labels);
>> net = alexnet;
>> net.Layers
```

```
>> inputSize = net.Layers(1).InputSize

>> layersTransfer = net.Layers(1:end-3);

>> numClasses = numel(categories(imdsTrain.Labels))

>> layers = [
    layersTransfer
    fullyConnectedLayer(numClasses,'WeightLearnRateFactor',20,'BiasLearnRateFactor',20)
    softmaxLayer
    classificationLayer];

>> pixelRange = [-30 30];

imageAugmenter = imageDataAugmenter( ...
    'RandXReflection',true, ...
    'RandXTranslation',pixelRange, ...
    'RandYTranslation',pixelRange);

augimdsTrain = augmentedImageDatastore(inputSize(1:2),imdsTrain, ...
    'DataAugmentation',imageAugmenter);

>> augimdsValidation = augmentedImageDatastore(inputSize(1:2),imdsValidation);

>> options = trainingOptions('sgdm', ...
    'MiniBatchSize',10, ...
    'MaxEpochs',20, ...
    'InitialLearnRate',1e-4, ...
    'ValidationData',augimdsValidation, ...
    'ValidationFrequency',3, ...
    'ValidationPatience',Inf, ...
```

```
'Verbose',true, ...
```

```
'Plots','training-progress');
```

```
>> netTransfer = trainNetwork(augimdsTrain,layers,options);
```

## VALIDATION

```
>> [YPred,scores] = classify(netTransfer,augimdsValidation);
```

```
>> YValidation = imdsValidation.Labels;
```

```
>> accuracy = mean(YPred == YValidation)
```

## Specificity and Sensitivity

```
>> y = grp2idx(YValidation);
```

```
>> test = grp2idx(YPred);
```

```
>> classperf(y,test)
```

## TESTING

```
>> imdsTest = imageDatastore('Testing', ...
```

```
'IncludeSubfolders',true, ...
```

```
'LabelSource','foldernames');
```

```
>> [YPred,scores] = classify(netTransfer,imdsTest);
```

```
>> YValidation = imdsTest.Labels;
```

```
>> accuracy = mean(YPred == YValidation)
```
